1 **Title: Association of seminal polyaromatic hydrocarbons exposome with idiopathic**  
2 **male factor infertility: A proteomic insight into sperm function**

3 **Authors:** Jasmine Nayak<sup>1,2,#</sup>, Soumya Ranjan Jena<sup>1,2,#</sup>, Sugandh Kumar<sup>3</sup>, Sujata Kar<sup>4</sup>,  
4 Anshuman Dixit<sup>3</sup>, Luna Samanta<sup>1,2,\*</sup>

5

6 **Affiliations**

7 <sup>1</sup>Redox Biology & Proteomics Laboratory, Department of Zoology, Ravenshaw University,  
8 Cuttack-753003, India

9 <sup>2</sup>Center of Excellence in Environment & Public Health, Ravenshaw University, Cuttack-  
10 753003, India

11 <sup>3</sup>Institute of Life Sciences, NALCO Square, Bhubaneswar, India

12 <sup>4</sup>Kar Clinic and Hospital Pvt. Ltd., Unit-IV, Bhubaneswar

13

14 **\*Corresponding author**

15 **#Equal contribution**

16

17 **Conflict of interest:** The authors have nothing to disclose

18 **Abstract**

19           Oxidative stress (OS) is implicated in 80% of idiopathic male infertility (IMI) patients  
20 where exposure to redox active environmental toxicants such as polyaromatic hydrocarbons  
21 (PAHs) may play. In the present study the seminal exposome of various PAH was analyzed  
22 in two separate cohorts including 43 fertile donors and 60 IMI patients by HPLC and receiver  
23 operator characteristic curve was applied to find out the cut-off limits. Furthermore,  
24 spermatozoa from both the groups were subjected to label free liquid chromatography mass  
25 spectroscopy (LC-MS/MS) followed by bioinformatics analysis to elucidate the molecular  
26 mechanism(s) involved and the key proteins from the affected pathways were validated by  
27 western blot along with oxidative modification of proteins. Of the 16 standard PAH 13 were  
28 detected in the semen. Receiver Operator Character (ROC) Curve analysis ( $AUC_{ROC}$ )  
29 revealed the PAHs having most significant effect on fertility are of the following order  
30 Anthracene<benzo(a)pyrene<benzo[b]fluoranthene<Fluoranthene<benzo(a)anthracene<indol  
31 (123CD)pyrene<pyrene<naphthalene<dibenzo(AH)anthracene<fluorene<2bromonaphthalene  
32 <chrysene<benzo(GH1)perylene. Benzo[a] pyrene is invariably present in all infertile  
33 patients while naphthalene is present in both fertile and IMI group. Of the total 773 detected  
34 proteins (Control: 631 and PAH: 717); 71 were differentially expressed (13 underexpressed,  
35 58 overexpressed) in IMI patients resulting in impaired mitochondrial dysfunction and  
36 oxidative phosphorylation, DNA damage, Aryl hydrocarbon receptor (AHR) signalling,  
37 xenobiotic metabolism and induction of NRF-2 mediated oxidative stress response (increased  
38 in 4-hydroxynonenal and nitrosylated protein adduct formation, and declined antioxidant  
39 defence). The increased GSH/GSSG ratio in patients may be an adaptive response to  
40 metabolize the xenobiotics via conjugation as evidenced by overexpression of AHR and Heat  
41 shock protein 90 beta (HSP90 $\beta$ ) in patients. Seminal PAH concentrations, oxidative protein  
42 modification along with protein markers (e.g. AHR and HSP90 $\beta$ ) may help in better  
43 prediction and management of IMI. Contribution of environment borne PAH in semen should  
44 not undermined in infertility evaluation.

45

46 **Keywords:** Idiopathic male infertility, polyaromatic hydrocarbon, proteomics, oxidative  
47 stress, AHR signalling, protein nitrosylation.

48

## 49 1. Introduction

50 Semen quality of men in their reproductive age is markedly deteriorating over past  
51 decades<sup>1,2</sup>. Approximately 15% of the co-inhabiting couples are infertile where 50% of them  
52 have abnormal semen parameters implying the involvement of male-infertility-associated  
53 factor<sup>3</sup>. Male infertility in general is known as a multi-causal effect with a very few large-  
54 scale epidemiological reports available<sup>4,5</sup>. Due to the paucity of information on causative  
55 factors on decline in semen quality; accurate diagnosis and personalized treatment options are  
56 restricted. An infertility case with unknown causative factor is identified and referred to as  
57 idiopathic infertility<sup>3,6</sup>. It is reported that ~75% of oligospermic men are idiopathic<sup>7</sup>. Albeit,  
58 the interplay between genetic, environmental and lifestyle factors are proposed to be behind  
59 this condition; very few reports established the role of environmental toxins in  
60 idiopathic infertility<sup>8</sup>. Most of the studies simply establish a correlation between environmental  
61 toxin levels in body fluids such as blood plasma or urine with semen parameter without  
62 giving much insight into the mechanisms involved<sup>8,9</sup>. European Association of Urology  
63 attributed idiopathic male factor infertility to endocrine disruption due to environmental  
64 pollution, reactive oxygen species, or genetic abnormalities<sup>10</sup>. In recent times, more  
65 emphasis is given to the “exposomes” concept that refers to the totality of environmental  
66 exposures of an individual during the lifetime. This novel approach combines the body  
67 burden of environmental toxins and modern omics technologies to study the role of the  
68 environment in human diseases<sup>11</sup>. Many environmental toxins such as pesticides, herbicides,  
69 phthalates and polycyclic aromatic hydrocarbons (PAHs) undergo metabolic activation in human  
70 body and cause oxidative stress<sup>12</sup>. Oxidative stress is time and again reported to not just  
71 correlate with defective sperm function but is causally involved in the genesis male factor  
72 infertility<sup>13-15</sup>. Male Oxidative Stress Infertility (MOSI) is proposed for the management of  
73 idiopathic male infertility with measurement of seminal oxidation-reduction potential (ORP)

74 as an easy clinical biomarker<sup>16</sup>. It is further suggested that upto 80% of the total cases of  
75 idiopathic infertility have augmented oxidative stress<sup>13-15</sup>. Therefore, it is imperative to look  
76 into the cause behind the aetiology of MOSI in idiopathic infertility as a function of  
77 environmental toxins.

78 The crucial environmental toxins, especially phthalates, bisphenols, pesticides, flame  
79 retardants and Polyaromatic hydrocarbons (PAHs) warrant special attention due to their  
80 potential role as endocrine disruptors affecting hypothalamo-pituitary-thyroid axis and  
81 hypothalamo-pituitary-gonadal axis<sup>17</sup>. PAHs are the by-products of incomplete combustion of  
82 organic materials generated from tobacco and cigarette smoke, barbequed food, vehicle  
83 exhaust and oil spillers as well as during coke production and chemical manufacturing. They  
84 are usually metabolically activated by cytochrome *P450* enzymes during steroidogenesis and  
85 promotes free radical generation<sup>18</sup>. The ROS ( $H_2O_2$  and  $O_2^{\cdot-}$ ) generated during normal  
86 steroidogenesis are within critical levels and play an important role in the regulation of  
87 steroidogenic activity of the Leydig cell<sup>19</sup>. The elevated production of ROS have been found  
88 to inhibit steroid productions, and causes damage to mitochondrial membrane of  
89 spermatozoa<sup>20</sup>. However, our knowledge on oxidative stress-induced idiopathic male  
90 infertility as a function of environmental borne seminal concentration of PAH is extremely  
91 limited in general and with respect to non-occupational exposure in particular. With this  
92 background, the present study in designed to analyse the level of PAH in the ejaculate of  
93 idiopathic infertile men and its relationship with induced oxidative stress via high throughput  
94 shotgun proteomic analysis in comparison to proven fertile donors to unravel the pathways  
95 involved towards discovery of plausible biomarkers.

96

## 97 2. Materials & Methods

### 98 2.1 *Ethics statement and Patient selection*

99 Patients attending the infertility centre and the proven fertile donors at Kar Clinic and  
100 Hospital Pvt. Ltd., Bhubaneswar, Odisha, India were recruited for the study after approval by  
101 the Institutional Ethics Committee. All participants gave an informed written consent to be  
102 included in this study. The exclusion criteria were leukocytospermia (Endtz positive),  
103 azoospermia, history of systemic illness, inflammation of reproductive tract (orchitis,  
104 epididymitis, urethritis, and testicular atrophy), sexually transmitted disease, and  
105 medications. The participants included in this study were non-smokers, non-alcoholic, and  
106 had a normal body mass index. Healthy donors (with no known medical condition) who had  
107 established fertility recently i.e., within one year with no cases of embryo loss were included  
108 as the control group. Subsequently upon estimation of PAH concentrations and receiver  
109 operator characteristic (ROC) curve analysis (as described below) in comparison to fertile  
110 donors, patients were segregated into PAH positive infertile group. Of the total 60 patients  
111 recruited for the study, 18 idiopathic infertile patients were excluded based on their lower than  
112 cut off value of one or more PAH present in their semen. Therefore, in the final step 43  
113 proven fertile donor were compared with 42 PAH positive idiopathic infertile patients.

### 114 2.2 *Semen analysis*

115 The semen samples were collected from all participants of both groups (idiopathic  
116 infertile patients  $n=60$  and fertile donor  $n=43$ ) by masturbation after 3-5 days of sexual  
117 abstinence. Samples were allowed to liquefy completely for 20-30 min at 37°C followed by  
118 semen analysis as per World Health Organization (WHO) 2010 guidelines (WHO 2010).  
119 Basic semen analysis included both macroscopic (volume, pH, colour, viscosity, liquefaction  
120 time) and microscopic parameters such as sperm concentration, motility and morphology, as

121 well as peroxidase or Endtz test. Samples with  $>1.0 \times 10^6$ /ml round cell with a positive  
122 peroxidase test were excluded from the study. After liquefaction and semen analysis, the  
123 samples were subjected to centrifugation at 400 g for 20 min at 37°C to separate the sperm  
124 and seminal plasma. The seminal plasma was processed for PAH measurement.

### 125 2.3 *Measurement of seminal PAH exposomes*

126 The HPLC analysis was carried out by injecting 20  $\mu$ L of the seminal plasma into the  
127 chromatographic system (Thermo Scientific UltiMate 3000) for the determination of PAHs  
128 concentration using PAH standards. PAHs were segregated by C-18 column with a gradient  
129 elution process using solvent water and acetonitrile. The elution conditions applied were: 0 –  
130 20 min, 40% of acetonitrile isocratic; 20 – 37 min, 50-100% of acetonitrile gradient, 37 – 42  
131 min, 100% of acetonitrile isocratic, 42 – 45 min, 100 - 40% of acetonitrile, gradient. The flow  
132 rate was set at 1 mL/min, at room temperature. Under these conditions, PAHs could be  
133 separated satisfactorily within 45 min. The PAHs were identified by comparing the retention  
134 time with those of standards taken. The concentration of PAH in semen was calculated  
135 according to the formula:

136 PAH concentration = Peak area of sample/Peak area of standard (known concentration)

### 137 2.4 *Determination of PAH threshold for incidence of infertility*

138 Receiver operating characteristics (ROC) curve is used in clinical biochemistry for the  
139 determination of the cut-off point in clinical deterioration. A ROC curve shows a graphical  
140 plot illustrating the diagnostic ability of a binary classifiers to identify the sensitivity and the  
141 specificity of PAH levels in the prediction of male fertility status. The ROC curves were  
142 created using total individual PAHs as “test variables,” and “fertile donor” versus idiopathic  
143 infertile patients” (binary variable, with fertile  $\frac{1}{4}$  0 and infertile patient  $\frac{1}{4}$  1) as “state  
144 variable” and setting the value of the “state variable” as 1. The optimal cut-off value was

145 determined with the use of the Youden index to maximize the sum of sensitivity and  
146 specificity.

#### 147 2.5 *Sperm protein Extraction and estimation*

148 Post separation from seminal plasma, sperm pellet extracted was washed thrice with  
149 phosphate buffer saline (PBS) and centrifuged at 400 g for 10 min, at 4°C. Sperm lysate was  
150 prepared by adding 100µl of Radio-immunoprecipitation assay (RIPA) buffer supplemented  
151 with Protease inhibitor cocktail (cOmplete ULTRA Tablets; Roche) to the sperm pellet and  
152 left overnight at 4 °C for complete cell lysis. The lysate was centrifuged at 14,000 g for 30  
153 min at 4 °C followed by separation of the supernatant. Protein quantification of the  
154 supernatant was determined using bicinchoninic acid (BCA; Thermo Fisher Scientific,  
155 Waltham, MA).

#### 156 2.6 *Assessment of Glutathione and Redox potential*

157 The total GSH equivalents (GSH + GSSG) were spectrophotometrically quantified by  
158 glutathione reductase (GR) recycling assay at the expense of oxidation of NADPH using 5-  
159 5'-dithiobis 2-nitrobenzoic acid (DTNB; Ellman's reagent). Similarly, GSSG was measured  
160 by masking GSH with 2-vinylpyridine. For measurement of the total GSH equivalents  
161 (GSH+GSSG), GR was added to the assay mixture for reduction of GSSG to GSH at the  
162 expense of oxidation of NADPH. The reduction potential (Ehc) of GSH/GSSG couple was  
163 calculated by using Nernst equation. The sperm lysate (described above) was precipitated  
164 with ice-cold 5% trichloroacetic acid containing 0.01N HCl, and cleared by centrifugation.  
165 The deproteinized supernatants were used for the assay. In brief, the assay mixture (final  
166 volume 200 µl) contained 3 mM NADPH in 125 mM Phosphate buffer containing 6.3 mM  
167 EDTA (pH 7.5), DTNB (0.6 mM) and sperm lysate (25 µg protein). To this 2 µl GR (~1 Unit,  
168 Sigma- Aldrich, St. Louis, MO, USA) was added and the yellow chromophore (2-nitro-5-

169 thiobenzoate: TNB<sup>2-</sup>) formed by the interaction of SH groups from GSH and GSSG (after  
170 conversion by GR) with DTNB was recorded at 405 nm in a iMark Absorbance Microplate  
171 Reader (BioRad Instruments, Inc., Japan) at 1-min intervals for 6 min. All the determinations  
172 were normalized to protein content. The absolute GSH amount was quantified from  
173 difference between the total GSH equivalent and the obtained GSSG value.

174 The glutathione redox potential ( $E^{hc}$ ) was calculated by Nernst equation for half  
175 reaction:

$$176 \quad E^{hc} = -240 - 61.5/2 \ln\{[GSH]^2/GSSG\} \text{ mV};$$

177 where -240mV is the standard redox potential ( $E^{\circ}$ ) of GSH at pH 0, -61.5/2 denotes  
178  $RT/zF$  i.e R= Gas constant (8.314 J K<sup>-1</sup> mol<sup>-1</sup>), T= absolute temperature of 37<sup>o</sup>C or 310 K,  
179 F= Faraday constant (9.64853 X 10<sup>4</sup> C mol<sup>-1</sup>), z = number of electrons exchanged in the  
180 chemical reaction  $GSSG + 2e^- + 2H^+ \rightarrow 2GSH$ .

## 181 2.7 Shotgun Proteome profiling of spermatozoa

182 The extracted spermatozoa proteins were subjected to LC-MS/MS for proteomic  
183 analysis. 50  $\mu$ l of sperm lysate from each sample (n=3 per group; one pooled sample and two  
184 individual samples) were taken and reduced with 5 mM TCEP, then alkylated with 50 mM  
185 iodoacetamide and subsequently digested with Trypsin (1:50, Trypsin/lysate ratio) for 16 h at  
186 37  $^{\circ}$ C. To eliminate the salt, these digests were cleansed using a C18 silica cartridge and then  
187 dried with a speed vac. Then the dried pellet was resuspended in buffer A (5% acetonitrile,  
188 0.1% formic acid). All the experiments were carried out using an EASY-nLC 1000 system  
189 (Thermo Fisher Scientific) combined with Thermo Fisher-QEXACTIVE mass spectrometer  
190 designed with nano-electrospray ion source. A 25 cm PicoFrit column (360 $\mu$ m outer  
191 diameter, 75 $\mu$ m inner diameter, 10 $\mu$ m tip) packed with 1.8  $\mu$ m of C18-resin (Dr Maeisch,  
192 Germany) was employed to resolve 1.0  $\mu$ g of the peptide mixture. The peptides were loaded



193 with buffer A and eluted at a flow rate of 300 nl/min for 100 minutes with a 0–40% gradient  
194 of buffer B (95% acetonitrile, 0.1% formic acid). The acquisition of MS data is done by  
195 considering the most abundant precursor ions from the survey scan using top 10 data-  
196 dependent method.

## 197 2.8 *Data Processing*

198 All the samples were processed and RAW files generated were analyzed with  
199 comparison to Uniprot HUMAN reference proteome (HUPO) database using Proteome  
200 Discoverer (v2.2). The precursor was set at 10 ppm and fragment mass tolerances was set at  
201 0.5 Da for SEQUEST search. The protease used to produce peptides, where enzyme  
202 specificity was set for trypsin/P (cleavage at the C terminus of “K/R: unless followed by “P”)  
203 along with maximum missed cleavages value of two. For database search, carbamidomethyl  
204 on cysteine was considered as fixed modification while N-terminal acetylation and oxidation  
205 of methionine were considered as variable modifications. Both protein False Discovery Rate  
206 (FDR) and peptide spectrum match were set to 0.01.

## 207 2.9 *Quantitative proteomics*

208 The following procedures were performed to execute Label free quantification (LFQ)  
209 suit for quantitative proteomics using MaxQuant v1.5.2.8 (<http://www.maxquant.org/>):  
210 feature identification, initial Andromeda search, recalibration, main Andromeda search, and  
211 posterior error probability calculation (likelihood of a protein being incorrectly recognized).  
212 At first, razor peptides and protein groups were identified. Proteins that cannot be identified  
213 unambiguously by distinct peptides but share peptides were grouped together and quantified  
214 as a single protein group. For instance, if all detected peptides of protein X were also  
215 identified for protein Y, X and Y are classified as one protein group (even though unique  
216 peptides were found for Y, since it was still uncertain whether X was present in the sample).

217 Only one common quantification was generated for both proteins in the result. A Razor  
218 peptide is formed when two protein groups (protein A and protein B) are unequivocally  
219 identified by distinct peptides yet share a common peptide. Following the discovery of  
220 distinct and unique peptides, a "match across the runs" procedure was used to match the same  
221 accurate masses across several LC-MS/MS runs within a 1.5-minute retention time frame.  
222 Relative quantification was determined by comparing the abundance of the same peptide  
223 species/protein across runs, whereas absolute quantification was determined by equating the  
224 quantities of various proteins in the same sample. The MaxQuant algorithms use peak  
225 detection and scoring of peptides, as well as mass calibration and protein quantification, to  
226 provide summary statistics. Protein abundances were normalized using the LFQ algorithm in  
227 MaxQuant and then converted to  $\text{Log}_2$  for further analysis. The label-free method analyses  
228 the intensity of these peptides to determine peptide ratios by taking the greatest number of  
229 detected peptides between any two samples. The median values of all peptide ratios of a  
230 given protein are used to calculate protein abundance.

### 231 *2.10 Bioinformatics analysis*

232 The differentially expressed proteins (DEPs) calculated based on  $\text{Log}_2$  fold change  $>$   
233 1 and p-value  $< 0.05$  were subjected to functional annotation and enrichment analysis by  
234 means of publicly available bioinformatics annotation tools and databases such as String,  
235 UniProt, and Cytoscape. Enriched terms were ranked by p-value (hypergeometric test) using  
236 Cytoscape ClueGO plugin. Venn diagram showing distribution pattern of proteins were  
237 drawn using Venny 2.1. Hierarchical clustering of the DEPs between fertile donor and  
238 idiopathic infertile patients were analysed by the construction of heat map using R.3.4.4  
239 package (Complex Heatmap map library). Euclidean distance correlation matrix was used for  
240 hierarchical clustering of the DEPs for dendrogram plotting showing complete linkage  
241 between the proteins. The Biological Networks Gene Ontology (BiNGO) application in

242 Cytoscape was used for the determination of significantly overrepresented Gene Ontology  
243 (GO) terms in the DEPs data set and the predominant functional themes of the tested DEPs  
244 were mapped to visualize the biological pathways altered in the infertile group. The protein-  
245 protein networks were obtained from the STRING database (<http://string-db.org/>). A  $p < 0.05$   
246 was considered significant. Proprietary curated database such as Ingenuity pathway analysis  
247 (IPA) was used to analyze the involvement of DEPs in biological and cellular processes,  
248 pathways, cellular distribution, protein-protein interactions and regulatory networks.

### 249 *2.11 Western blotting*

250 Two key protein markers of PAH metabolism, i.e., AhR and HSP90 $\beta$ (sc-101104,sc-  
251 59578, Santacruz, Mouse) were validated by western blotting. Besides, the impact of induced  
252 oxidative stress on protein modifications, namely, 4-Hydroxynonenal (HNE)(ab46545,  
253 Rabbit, Abcam) protein adduct formation and anti-3-nitro-tyrosine(ab110282, Mouse,  
254 Abcam) were also studied by western blotting. From every group two individual and one  
255 pooled samples were run in duplicates to maintain biological and technical variabilities.  
256 Samples were normalized for protein concentration in each group. Washed spermatozoa were  
257 lysed in RIPA lysis buffer (Sigma-Aldrich, St. Louis, MO, USA) overnight at 4°C containing  
258 proteinase inhibitor cocktail (Roche, Indianapolis, IN, USA). Samples containing 20-30  $\mu$ g of  
259 protein in 15  $\mu$ l volume per sample were separated on a 4-20% SDS-PAGE and electroblotted  
260 onto polyvinylidenedifluoride (PVDF) membranes. Then the proteins transferred to PVDF  
261 membrane was blocked with 5% non-fat dry milk in Tris-buffered saline Tween 20 (TBST)  
262 buffer for 2 hrs. After that primary antibody incubation was done overnight (4°C) followed  
263 by the specific secondary antibodies (Mouse, Rabbit, Abcam) at room temperature for 3 hrs.  
264 Blots were then washed using TBST and protein bands were visualized using an enhanced  
265 chemiluminescence kit- Pierce™ ECL Western Blotting Substrate (Thermo Scientific,  
266 Rockford, IL, USA) in ChemiDoc™ MP Imaging System (BioRad, Hercules, CA, USA).

267 The densitometric analysis of western blot images was done through Image J software  
268 (NIH,Bethesda,MD) by total intensity normalisation method. Results were expressed as fold  
269 change relative to the fertile donor.

## 270 *2.12 Statistical Analysis*

271 Statistical analysis was performed by MedCalc Statistical Software, ver. 17.4  
272 (MedCalc Software; Ostend, Belgium). The data are expressed as mean  $\pm$  standard  
273 deviation (SD). Normalization of data was assessed using Shapiro–Wilk test followed by  
274 Levene’s test for homogeneity of variance. Data on semen parameters and biochemical  
275 estimation were analyzed by Mann-Whitney U-test. Results of LC-MS/MS proteomics and  
276 Western blotting was subjected to Welch's t-test, or unequal variances t-test. A difference of  
277  $p < 0.05$  (minimum) was considered significant.

## 278 **3. Results**

### 279 *3.1 Semen analysis*

280 Seminogram results are presented in **Table S1**. All idiopathic infertile patients  
281 included in this study have at least one semen parameter in semen analysis below WHO  
282 2010 criteria. However, the average values were within the range, but the sperm  
283 concentration, motility, morphology and vitality were considered significant.

### 284 *3.2 PAH Exposome in semen*

285 Out of the 16 standard PAHs used for screening, a total of 13 PAH metabolites, i.e.,  
286 Anthracene, Benzo (A) Anthracene, Benzo (A) Pyrene, Benzo (B) Fluoranthene, Benzo  
287 (GH1) Perylene, Chrysene, Dibenzo (AH) Anthracene, Fluorene, Fluoranthene, Indo (123  
288 CD) Pyrene, Napthalene, 2 Bromonapthalene, Phenanthrene, Pyrene were detected in the  
289 semen samples at ng/ml level (**Fig 1**). However, the concentration of PAH in the semen of  
290 idiopathic infertile patients were significantly higher in comparison to the fertile donor. The

291 cut-off level of these PAHs (if any) determined by ROC curve analysis segregates the fertile  
292 from the idiopathic infertile patients. The results of the ROC analysis are presented in **Fig.**  
293 **1, Table S2**. Benzo (A) Pyrene particularly is found to be highly discriminative among 13  
294 PAHs in idiopathic infertile patients.

### 295 3.3 *Effect of PAH concentration on Sperm redox status*

296 To corroborate the alteration in the redox environment of sperm in the idiopathic  
297 infertile patients, ratio of GSH:GSSG was measured. An increase in the absolute  
298 concentrations of GSH and GSH:GSSG ratio was noticed in idiopathic infertile patients (**Fig.**  
299 **2A,B**). The reduction potential in spermatozoa of idiopathic infertile patients is more negative  
300 with respect to fertile donor (**Fig. 2C**). A reduction in the level of total antioxidant capacity of  
301 sperm was observed in the infertile group as compared to fertile control (**Fig. 2D**).

### 302 3.4 *Global proteome profiling of spermatozoa*

303 The quantitative differential proteomic analysis identified a total of 773 proteins in  
304 fertile donor and idiopathic infertile patients by label free LC-MS/MS. Out of the total 773  
305 proteins, 631 were from fertile donor and 717 from idiopathic infertile patients with 575  
306 proteins common in both (**Fig. 3**). A total of 71 DEPs (based on Log<sub>2</sub> fold change >1 and p-  
307 value < 0.05) were detected, of which 13 and 58 were under- and over-expressed,  
308 respectively in idiopathic infertile patients compared to fertile donor (**Fig. 3, Table S3**). The  
309 hierarchical clustering by heat map showed over and under expressed proteins into the two  
310 groups distinctively (**Fig. 3**).

311 The functional enrichment analysis of Gene Ontology (GO) by ClueGO revealed that  
312 the identified proteins were involved in various crucial biological functions such as  
313 chromosome condensation (GO:0030261), hexokinase activity (GO:0004396), nucleosome  
314 assembly (GO:0006334), canonical glycolysis (GO:0061621) and NADH regeneration  
315 (GO:0006735). The enriched cellular component and molecular functions were ATPase

316 dependent transmembrane transport complex (GO:0098533), sperm flagellum (GO:0036126),  
317 endocytic vesicle lumen (GO:0071682), nucleosome (GO:0000786), metallo-exopeptidase  
318 activity GO:0008235, hexokinase activity (GO:0004396) and glucose binding  
319 (GO:0005536).The enriched processes and the identified proteins involved in various  
320 molecular functions along with its localisation were shown in **Fig. 4, Table S4**.

### 321 3.5 *Functional pathway analysis of Differentially Expressed Protein*

322 The BiNGO mapping revealed the involvement of DEPs in reproduction,  
323 spermatogenesis, nucleosome assembly, chromatin assembly, DNA packaging and glycolysis  
324 (Bonferroni step down with p value  $\leq 0.001$ ) resulting in DNA damage, impaired energy  
325 metabolism and reproductive function (**Fig. 5**). String protein-protein interaction analysis of  
326 DEPs revealed that the major pathways deregulated are Glycolysis/Gluconeogenesis  
327 (HAS:00010; FDR 1.15e-06), Fatty acid degradation (HAS:00071; FDR 0.0054),HIF-1  
328 signaling pathway (HAS:04066; FDR 0.0281), Estrogen signaling pathway (HAS:04915;  
329 FDR 0.0498), Oxidative phosphorylation (HAS:00190; FDR 0.0498), Metabolic pathways  
330 (HAS:01100; FDR 0.0029),DNA packaging (GO:0006323; FDR 0.00072),Regulation of  
331 regulation of reactive oxygen species metabolic process (GO:2000377; FDR 0.0414), Post-  
332 translational protein modification (GO:0043687;FDR 0.0080), and Spermatogenesis  
333 (GO:0007283; FDR 0.0284) (**Fig. S1**). The protein interaction of upregulated DEPs by IPA  
334 identified the topmost molecular network to be associated with Cancer, Endocrine System  
335 Disorders, Organismal Injury and Abnormalities where out of the 35 nodal proteins 18 were  
336 detected in our dataset. In the second most pathway the proteins were involved in Cell Death  
337 and Survival, Cellular Development, Organismal Survival where out of 21 nodal proteins 12  
338 were from our dataset. The downregulated DEPs topmost network is associated with Cancer,  
339 Cell Death and Survival, Organismal Injury and Abnormalities where out of 19 nodal  
340 proteins 9 were found in our dataset (**Fig. 6 & 7, Table S5**).

341 IPA canonical pathway revealed that Aryl Hydrocarbon Receptor Signaling, Hypoxia  
342 Signaling in the Cardiovascular System, Telomerase Signaling, PPAR Signaling, Xenobiotic  
343 Metabolism Signaling, eNOS Signaling and Oxidative Phosphorylation were deregulated  
344 (**Fig. 8, Table S6**)

345 The top toxicity list and functions determined by IPA-Toxicological pathway showed  
346 that Aryl Hydrocarbon Receptor (AhR) Signalling, Xenobiotic Metabolism Signalling, Fatty  
347 Acid Metabolism, Hypoxia-Inducible Factor Signalling, NRF2-mediated Oxidative Stress  
348 Response, Mitochondrial Dysfunction and Oxidative Phosphorylation are the most affected  
349 toxicological functions (**Fig. 8, Table S7**).

### 350 3.6 *Expression profile of key pathway proteins*

351 The key proteins in top canonical pathway are AhR (predicted) and Heat shock  
352 protein (HSP)90 $\beta$  validated by western blot (**Fig. 9 C & D**) which corroborated the LC-  
353 MS/MS data. Both the proteins were found to be over expressed in the idiopathic infertile  
354 patients as compared to fertile donor. The expression of 4-Hydroxynonenal (HNE) protein  
355 adduct and protein nitrosylation were also found to be overexpressed in idiopathic infertile  
356 patients (**Fig. 9 A & B**).

## 357 4. Discussion

358 Polyaromatic hydrocarbons (PAHs) are known endocrine disruptors which mimic the  
359 reproductive hormones and interfere with their synthesis by acting as agonist and antagonists.  
360 Several research studies on adult rodents with PAHs such as B(a)P, 2,3,7,8-  
361 Tetrachlorodibenzodioxin and 3-Methylchloranthrene results in an increase in the number of  
362 abnormal sperm and immature germ cells<sup>21,22</sup>, affects spermatogenesis by causing testicular  
363 atrophy<sup>23</sup>, diminishes testicular weight and increase apoptosis in seminiferous tubules<sup>24,25</sup>.  
364 Apart from this PAHs also disrupt the normal embryonic development by inducing oxidative

365 stress. A study by Delfino, demonstrated that exposure to PAHs disrupt the redox balance and  
366 generate reactive oxygen species (ROS) <sup>26</sup>. This leads to oxidative stress causing damage to  
367 biomolecules such as DNA, lipid and protein involved in the development of reproductive  
368 process. In the current study, seminal PAH concentration was measured in the semen of  
369 idiopathic infertile patients followed by proteomics of spermatozoa to understand the  
370 mechanism(s) by which PAHs elicit male infertility. Several studies have shown that urinary  
371 1-hydroxypyrene (1-OHP) is a good biological index for the occupational exposure  
372 assessment of PAHs <sup>27</sup>. In a study by Xia et al, men with higher urinary concentrations of 1-  
373 hydroxypyrene, 2-hydroxyfluorene and sum of all four PAH metabolites (assessed as tertiles)  
374 were more likely to have idiopathic male infertility <sup>27</sup>. In another study, the same authors  
375 <sup>27</sup>reported that higher urinary 1-hydroxypyrene (assessed as quantiles) levels were more  
376 likely to have below reference sperm concentration and total sperm count. Similarly, Song et  
377 al found a direct correlation between blood concentrations of PAH with sperm motility and a  
378 decrease in pregnancy outcome <sup>28</sup>. But no concrete data were available on semen  
379 concentration of PAH with respect to infertility to justify their involvement in  
380 spermatogenesis, sperm maturation and sperm function.

381 This pioneer study reports association between idiopathic male factor infertility with  
382 comprehensive screening data of PAHs in the semen resulting in sperm dysfunction through  
383 shotgun proteomic analysis. A total of 13 PAHs out of the 16 standards were identified in our  
384 sample implying the ubiquitous incidence in non-occupational peoples (only 4 people in the  
385 patient group are smokers). The concentrations of all the 13 PAHs detected were significantly  
386 higher ( $p < 0.0001$ ) in idiopathic infertile patients with respect to fertile donors. Based on  
387  $AUC_{ROC}$  the PAHs having most significant effect on fertility are of the following order  
388 Anthracene < benzo(a)pyrene < benzo[b]fluoranthene < Fluoranthene < benzo(a)anthracene < indol  
389 (123CD)pyrene < pyrene < naphthalene < dibenzo(AH)anthracene < fluorene < 2-bromonaphthalene



390 <chrysene<benzo(GH1)perylene. Irrespective of fertility status all analyzed samples  
391 possessed naphthalene, albeit at different concentration showing the highest cut-off value of  
392 868ng/ml. On the other hand, the lowest was noticed for bothchrysene and benzo(a)pyrene at  
393 6 ng/ml and benzo(a)pyrene being the ubiquitous one in idiopathic infertile patients  
394 distinctively segregating infertile men from their fertile counter parts. Four out of 43 semen  
395 samples analyzed in fertile donor (~9%) showed measurable benzo(a)pyrene ( $0.35 \pm$   
396  $1.17\text{ng/ml}$ ). On the other hand, substantially high level of benzo(a)pyrene ( $43.37 \pm$   
397  $38.57\text{ng/ml}$ ) was detected in all the 60 semen samples analyzed in idiopathic infertile  
398 patients. Thus, benzo(a)pyrene can be used as a marker to distinguish infertile men from  
399 fertile one with 66.67% sensitivity and 100% specificity at 95% CI (confidence interval).A  
400 large cohort study may further substantiate our findings.Though most of the idiopathic  
401 infertile males participated in the present study have normal spermiogram, ~30% have  
402 declined motility while~60% have above normal anomalous spermatozoa. It will not be out  
403 of context to mention that prenatal exposure of benzo(a)pyrene to Gclm knockout mice  
404 resulted reduction in testicular weight, testicular sperm head counts, epididymal sperm  
405 counts, and epididymal sperm motility when analyzed at 10-weeks of age, relative to wild  
406 type littermates <sup>29</sup>.In another study on Mexican workers in a rubber factory with potential  
407 occupational exposure to PAHs, impaired spermatogenesis was reported evinced by increased  
408 anomalies in sperm concentration, motility and morphology <sup>30</sup>.In fact, we have observed  
409 increased retention of histone proteins (H1-3, H1-4, H1-7, H2BC19P, H2BC11, H2BC12,  
410 H2BS1) in the spermatozoa of idiopathic infertile patients implying improper nuclear  
411 remodelling <sup>31</sup>. Furthermore, the gene ontology and protein-protein interaction analysis data  
412 (BiNGO, ClueGO, String) reveal that DNA packaging, chromatin assembly and nucleosome  
413 assembly is deregulated in patient group. PAHs are also known to cause potential DNA  
414 damage in case of idiopathic infertile males <sup>32</sup>. Interactive metabolites of PAHs may reach the

415 testicles and epididymis forming sperm DNA adducts<sup>33</sup>. In addition, the compounds resulting  
416 from PAH oxidation have the ability to enter oxidation cycles, which increase the generation  
417 of ROS and thus cause sperm DNA damage. To corroborate the findings we observed  
418 significantly higher 4-HNE and S-Nitrotyrosine levels in the spermatozoa of infertile patients  
419 in comparison to their fertile counterparts. Apart from improper compaction and packaging of  
420 sperm DNA, the major alterations in carbohydrate metabolism and active transport across  
421 membrane leads to production of dysfunctional spermatozoa. The predicted altered NADH  
422 regeneration pathway further corroborates the imbalance in cellular redox state which is  
423 expected from redox acting toxicants like PAHs<sup>34</sup>.

424 In this study, 71 DEPs were reported in patient group with higher levels of PAH and  
425 IPA toxicity list of these DEPs was predicted to be involved in Aryl Hydrocarbon Receptor  
426 (AhR) Signalling, Xenobiotic Metabolism Signalling, Hypoxia-Inducible Factor Signalling,  
427 NRF2-mediated Oxidative Stress Response, Mitochondrial Dysfunction and Oxidative  
428 Phosphorylation. The AhR is ligand-activated transcription factor that responds to endogenous  
429 ligands in addition to exogenous xenobiotic ligands, such as PAHs<sup>35</sup>. Upon ligand binding,  
430 AhR translocates to nucleus where it binds to AhR nuclear transporter (ARNT) and activates  
431 xenobiotic metabolizing enzymes: cytochrome P450 (CYP) 1A1, 1A2, and 1B1 for  
432 catalyzing oxidative biotransformation of xenobiotics<sup>36,37</sup>. After biotransformation PAHs  
433 generate potential reactive intermediates<sup>38,39</sup>. In fact, Hansen et al., reported the role of AhR  
434 signalling in maintenance of Sertoli cell architecture and resultant spermatogenesis in AhR  
435 knockout mice where the poorly remodelled spermatozoa are suggested to be more  
436 susceptible to oxidant attack<sup>40</sup>. In the present study an increased expression of 4-HNE and 3-  
437 Nitrotyrosine implies induction of oxidative stress. On the other hand, 4-HNE is known to  
438 produce DNA adduct<sup>41</sup> as observed in case of PAH exposure and AhR signalling<sup>42</sup>. It is  
439 pertinent to mention here that the levels of 4-HNE within spermatozoa are positively

440 correlated with mitochondrial superoxide formation<sup>43</sup>, and elevated 4-HNE is responsible for  
441 numerous adverse effects on sperm function such as decline in motility, morphology,  
442 acrosome reaction, sperm-oocyte interaction and apoptosis<sup>44,45</sup>. The BiNGO and IPA  
443 canonical pathway analysis further supports the hypothesis. Protein S-nitrosylation is  
444 responsible for protection of the proteins under oxidative stress, however irreversible S-  
445 nitrosylation leads to pathological condition. Of late, it has been elucidated that  
446 hydrophobic bio-structures like cell membranes and lipoproteins undergo S-nitrosylation and  
447 has strong association with lipid peroxidation<sup>46</sup>. Therefore, it is quite natural to observe an  
448 increase in both 4-HNE and 3-nitrotyrosine concentrations in the spermatozoa of infertile  
449 patients implying PAH-induced oxidative stress. Further, experimental strategies may reveal  
450 the proximal oxidizing mechanism during tyrosine nitration including mapping and  
451 identification of the tyrosine nitration sites in specific proteins in the spermatozoa of  
452 idiopathic infertile men. Moreover, parallel over-expression of AhR and HSP90 $\beta$  as observed  
453 by western blot in the present study corroborated the finding as it is suggested that ligand-  
454 bound AhR translocates to the nucleus with HSP90 $\beta$  showing its co-localization in the  
455 nucleus<sup>47</sup>. In contrast to AhR-dependent and CYP1A-mediated production of intracellular  
456 ROS, the AhR signaling pathway also regulates the expression of genes involved in  
457 antioxidant responses. Besides AhR signaling, NRF2 is another important transcription factor  
458 regulating genes that are critically involved in the metabolism of xenobiotics as well as  
459 endogenous compounds which is reported as top toxicological pathway in our DEP data set.  
460 Both signaling pathways respond to environmental and endogenous stressors. Albeit, AhR  
461 and NRF2 are clearly separated signaling pathways, recent reports demonstrate the cross-  
462 regulation between these two signaling axes suggesting an integrated response to  
463 environmental stressors<sup>48</sup>.

464 Glutathione, an important antioxidant is involved in the elimination of PAHs and  
465 spermatozoa depend heavily on glutathione metabolizing system for its survival<sup>49</sup>. The  
466 reactive intermediates formed after metabolism of PAHs are conjugated to glutathione and  
467 eliminated by glutathione-S-transferases (GST) and glutathione peroxidase (GPx) <sup>50</sup>.  
468 Glutathione (GSH) acts as a redox sensor by oxidizing to glutathione disulfide molecule  
469 (GSSG). So the ratio of GSH to GSSG is used as a biosignature of oxidized intracellular  
470 environment <sup>51</sup>.A recent report by Branco et al., 2021 have reported that PAH and their  
471 metabolites show idiosyncratic behaviour with respect to glutathione metabolism where  
472 phenanthrene induced higher ROS production. On the other hand, the authors reported  
473 increased GSH levels by benzo(b)fluoranthene along with augmented levels of protein  
474 sulfhydryl group. The upregulation of GSH was opined to be a consequence of Nrf2 signalling  
475 activation and increased levels of glutathione metabolising enzymes and their mRNA after  
476 exposure to benzo(b)fluoranthene, but not during exposure to phenanthrene <sup>52</sup>.Moreover, data  
477 of the present study shows a distinct energy deprived and hypoxic state in the spermatozoa of  
478 infertile men due to declined redox potential which is similar to the results of previously  
479 report by our group for unilateral varicocele patients <sup>53</sup>.

## 480 **Conclusion**

481 The present findings surmise the adverse impact of environment borne PAHs  
482 exposure on sperm function in idiopathic infertility which are largely ignored in regular  
483 infertility assessment. The high level of benzo(a)pyrene in the infertile group could serve as a  
484 predictive marker for idiopathic infertility along with the signature proteins AhR and the  
485 HSPs, particularly the HSP90. The presence of oxidative protein modification and differential  
486 expression of proteins involved in chromatin packaging and DNA damage further  
487 corroborates the noxious effect of PAH in semen (Figure 10). Therefore, it is suggested that  
488 along with seminogram and other biological markers, analysis of seminal levels of

489 environmental toxins such as PAH in general and benzo(a)pyrene in particular may help in  
490 proper management of idiopathic male factor infertility.

491 **Declaration of Competing Interest:** The authors declare that they have no known  
492 competing financial interests or personal relationships that could have appeared to influence  
493 the work reported in this paper.

494 **Acknowledgement:** The authors thank Director, DBT-Institute of Life Science,  
495 Bhubaneswar, India for the computational facilities.

496 **Funding information:** Department of Science and Technology (INSPIRE programme Grant  
497 No. DST/AORCIF/IF150007); University Grants Commission, Government of India (Grant  
498 No. 19/06/2016(i) EU-V); Higher Education Department, Government of Odisha (Grant No  
499 26913/HED/HE-PTC-WB-02-17(OHEPEE)).

## 500 **References**

- 501 1. Carlsen E, Giwercman A, Keiding N, Skakkebaek NE. Evidence for decreasing quality of semen  
502 during past 50 years. *Bmj*. Sep 12 1992;305(6854):609-613.
- 503 2. Guzick DS, Overstreet JW, Factor-Litvak P, et al. Sperm morphology, motility, and  
504 concentration in fertile and infertile men. *The New England journal of medicine*. Nov 8  
505 2001;345(19):1388-1393.
- 506 3. Jungwirth A, Giwercman A, Tournaye H, et al. European Association of Urology guidelines on  
507 Male Infertility: the 2012 update. *European urology*. Aug 2012;62(2):324-332.
- 508 4. Pierik FH, Van Ginneken AM, Dohle GR, Vreeburg JT, Weber RF. The advantages of  
509 standardized evaluation of male infertility. *International journal of andrology*. Dec  
510 2000;23(6):340-346.
- 511 5. Tuttelmann F, Werny F, Cooper TG, Kliesch S, Simoni M, Nieschlag E. Clinical experience with  
512 azoospermia: aetiology and chances for spermatozoa detection upon biopsy. *International  
513 journal of andrology*. Aug 2011;34(4):291-298.
- 514 6. de Kretser DM. Male infertility. *Lancet*. Mar 15 1997;349(9054):787-790.
- 515 7. Punab M, Poolamets O, Paju P, et al. Causes of male infertility: a 9-year prospective  
516 monocentre study on 1737 patients with reduced total sperm counts. *Human reproduction*.  
517 Jan 2017;32(1):18-31.
- 518 8. Krzastek SC, Farhi J, Gray M, Smith RP. Impact of environmental toxin exposure on male  
519 fertility potential. *Translational andrology and urology*. Dec 2020;9(6):2797-2813.
- 520 9. Zhu H, Martinez-Moral MP, Kannan K. Variability in urinary biomarkers of human exposure  
521 to polycyclic aromatic hydrocarbons and its association with oxidative stress. *Environment  
522 international*. Jun 21 2021;156:106720.
- 523 10. Sharman R. European Association of Urology-32nd Annual Congress (March 24-28, 2017-  
524 London, UK). *Drugs of Today (Barcelona, Spain: 1998)*. 2017;53(4):257-263.

- 525 11. Vineis P, Robinson O, Chadeau-Hyam M, Dehghan A, Mudway I, Dagnino S. What is new in  
526 the exposome? *Environment international*. Oct 2020;143:105887.
- 527 12. Baulig A, Garlatti M, Bonvallot V, et al. Involvement of reactive oxygen species in the  
528 metabolic pathways triggered by diesel exhaust particles in human airway epithelial cells.  
529 *American journal of physiology. Lung cellular and molecular physiology*. Sep  
530 2003;285(3):L671-679.
- 531 13. Agarwal A, Sharma RK, Nallella KP, Thomas AJ, Jr., Alvarez JG, Sikka SC. Reactive oxygen  
532 species as an independent marker of male factor infertility. *Fertility and sterility*. Oct  
533 2006;86(4):878-885.
- 534 14. Wagner H, Cheng JW, Ko EY. Role of reactive oxygen species in male infertility: An updated  
535 review of literature. *Arab journal of urology*. Mar 2018;16(1):35-43.
- 536 15. Aitken RJ. Oxidative stress and the etiology of male infertility. *Journal of assisted  
537 reproduction and genetics*. Dec 2016;33(12):1691-1692.
- 538 16. Agarwal A, Parekh N, Panner Selvam MK, et al. Male Oxidative Stress Infertility (MOSI):  
539 Proposed Terminology and Clinical Practice Guidelines for Management of Idiopathic Male  
540 Infertility. *The world journal of men's health*. Sep 2019;37(3):296-312.
- 541 17. Maric T, Fucic A, Aghayanian A. Environmental and occupational exposures associated with  
542 male infertility. *Arhiv za higijenu rada i toksikologiju*. Jun 28 2021;72(3):101-113.
- 543 18. Hanukoglu I. Antioxidant protective mechanisms against reactive oxygen species (ROS)  
544 generated by mitochondrial P450 systems in steroidogenic cells. *Drug metabolism reviews*.  
545 2006;38(1-2):171-196.
- 546 19. Tai P, Ascoli M. Reactive oxygen species (ROS) play a critical role in the cAMP-induced  
547 activation of Ras and the phosphorylation of ERK1/2 in Leydig cells. *Molecular  
548 endocrinology*. May 2011;25(5):885-893.
- 549 20. Luo L, Chen H, Trush MA, Show MD, Anway MD, Zirkin BR. Aging and the brown Norway rat  
550 leydig cell antioxidant defense system. *Journal of andrology*. Mar-Apr 2006;27(2):240-247.
- 551 21. Viczian M. The effect of cigarette smoke inhalation on spermatogenesis in rats. *Experientia*.  
552 May 15 1968;24(5):511-513.
- 553 22. Wyrobek AJ, Bruce WR. Chemical induction of sperm abnormalities in mice. *Proceedings of  
554 the National Academy of Sciences of the United States of America*. Nov 1975;72(11):4425-  
555 4429.
- 556 23. Mattison DR. The effects of smoking on fertility from gametogenesis to implantation.  
557 *Environmental research*. Aug 1982;28(2):410-433.
- 558 24. Denison MS, Heath-Pagliuso S. The Ah receptor: a regulator of the biochemical and  
559 toxicological actions of structurally diverse chemicals. *Bulletin of environmental  
560 contamination and toxicology*. Nov 1998;61(5):557-568.
- 561 25. Coutts SM, Fulton N, Anderson RA. Environmental toxicant-induced germ cell apoptosis in  
562 the human fetal testis. *Human reproduction*. Nov 2007;22(11):2912-2918.
- 563 26. Delfino RJ, Staimer N, Vaziri ND. Air pollution and circulating biomarkers of oxidative stress.  
564 *Air quality, atmosphere, & health*. Mar 1 2011;4(1):37-52.
- 565 27. Xia Y, Zhu P, Han Y, et al. Urinary metabolites of polycyclic aromatic hydrocarbons in relation  
566 to idiopathic male infertility. *Human reproduction*. May 2009;24(5):1067-1074.
- 567 28. Song XF, Chen ZY, Zang ZJ, et al. Investigation of polycyclic aromatic hydrocarbon level in  
568 blood and semen quality for residents in Pearl River Delta Region in China. *Environment  
569 international*. Oct 2013;60:97-105.
- 570 29. Nakamura BN, Mohar I, Lawson GW, et al. Increased sensitivity to testicular toxicity of  
571 transplacental benzo[a]pyrene exposure in male glutamate cysteine ligase modifier subunit  
572 knockout (Gclm<sup>-/-</sup>) mice. *Toxicological sciences : an official journal of the Society of  
573 Toxicology*. Mar 2012;126(1):227-241.

- 574 30. De Celis R, Feria-Velasco A, Gonzalez-Unzaga M, Torres-Calleja J, Pedron-Nuevo N. Semen  
575 quality of workers occupationally exposed to hydrocarbons. *Fertility and sterility*. Feb  
576 2000;73(2):221-228.
- 577 31. Torres-Flores U, Hernandez-Hernandez A. The Interplay Between Replacement and  
578 Retention of Histones in the Sperm Genome. *Frontiers in genetics*. 2020;11:780.
- 579 32. Saad AA, Hussein T, El-Sikaily A, et al. Effect of Polycyclic Aromatic Hydrocarbons Exposure  
580 on Sperm DNA in Idiopathic Male Infertility. *Journal of health & pollution*. Mar  
581 2019;9(21):190309.
- 582 33. Gaspari L, Chang SS, Santella RM, Garte S, Pedotti P, Taioli E. Polycyclic aromatic  
583 hydrocarbon-DNA adducts in human sperm as a marker of DNA damage and infertility.  
584 *Mutation research*. Mar 3 2003;535(2):155-160.
- 585 34. Urlacher VB, Eiben S. Cytochrome P450 monooxygenases: perspectives for synthetic  
586 application. *Trends in biotechnology*. Jul 2006;24(7):324-330.
- 587 35. Denison MS, Soshilov AA, He G, DeGroot DE, Zhao B. Exactly the same but different:  
588 promiscuity and diversity in the molecular mechanisms of action of the aryl hydrocarbon  
589 (dioxin) receptor. *Toxicological sciences : an official journal of the Society of Toxicology*. Nov  
590 2011;124(1):1-22.
- 591 36. Zanger UM, Schwab M. Cytochrome P450 enzymes in drug metabolism: regulation of gene  
592 expression, enzyme activities, and impact of genetic variation. *Pharmacology & therapeutics*.  
593 Apr 2013;138(1):103-141.
- 594 37. Khorram O, Garthwaite M, Jones J, Golos T. Expression of aryl hydrocarbon receptor (AHR)  
595 and aryl hydrocarbon receptor nuclear translocator (ARNT) mRNA expression in human  
596 spermatozoa. *Medical science monitor : international medical journal of experimental and  
597 clinical research*. May 2004;10(5):BR135-138.
- 598 38. Shimada T, Murayama N, Yamazaki H, et al. Metabolic activation of polycyclic aromatic  
599 hydrocarbons and aryl and heterocyclic amines by human cytochromes P450 2A13 and 2A6.  
600 *Chemical research in toxicology*. Apr 15 2013;26(4):529-537.
- 601 39. Shimada T, Fujii-Kuriyama Y. Metabolic activation of polycyclic aromatic hydrocarbons to  
602 carcinogens by cytochromes P450 1A1 and 1B1. *Cancer science*. Jan 2004;95(1):1-6.
- 603 40. Hansen DA, Esakky P, Drury A, Lamb L, Moley KH. The aryl hydrocarbon receptor is  
604 important for proper seminiferous tubule architecture and sperm development in mice.  
605 *Biology of reproduction*. Jan 2014;90(1):8.
- 606 41. Bin P, Shen M, Li H, et al. Increased levels of urinary biomarkers of lipid peroxidation  
607 products among workers occupationally exposed to diesel engine exhaust. *Free radical  
608 research*. Aug 2016;50(8):820-830.
- 609 42. Gu A, Ji G, Jiang T, et al. Contributions of aryl hydrocarbon receptor genetic variants to the  
610 risk of glioma and PAH-DNA adducts. *Toxicological sciences : an official journal of the Society  
611 of Toxicology*. Aug 2012;128(2):357-364.
- 612 43. Aitken RJ, Clarkson JS, Fishel S. Generation of reactive oxygen species, lipid peroxidation, and  
613 human sperm function. *Biology of reproduction*. Jul 1989;41(1):183-197.
- 614 44. Aitken RJ, Whiting S, De Iuliis GN, McClymont S, Mitchell LA, Baker MA. Electrophilic  
615 aldehydes generated by sperm metabolism activate mitochondrial reactive oxygen species  
616 generation and apoptosis by targeting succinate dehydrogenase. *The Journal of biological  
617 chemistry*. Sep 21 2012;287(39):33048-33060.
- 618 45. Aitken RJ, Gibb Z, Mitchell LA, Lambourne SR, Connaughton HS, De Iuliis GN. Sperm motility  
619 is lost in vitro as a consequence of mitochondrial free radical production and the generation  
620 of electrophilic aldehydes but can be significantly rescued by the presence of nucleophilic  
621 thiols. *Biology of reproduction*. Nov 2012;87(5):110.
- 622 46. Bartesaghi S, Radi R. Fundamentals on the biochemistry of peroxyxynitrite and protein tyrosine  
623 nitration. *Redox biology*. Apr 2018;14:618-625.

- 624 47. Tsuji N, Fukuda K, Nagata Y, et al. The activation mechanism of the aryl hydrocarbon  
625 receptor (AhR) by molecular chaperone HSP90. *FEBS open bio*. 2014;4:796-803.
- 626 48. Kohle C, Bock KW. Activation of coupled Ah receptor and Nrf2 gene batteries by dietary  
627 phytochemicals in relation to chemoprevention. *Biochemical pharmacology*. Sep 28  
628 2006;72(7):795-805.
- 629 49. Adeoye O, Olawumi J, Opeyemi A, Christiania O. Review on the role of glutathione on  
630 oxidative stress and infertility. *JBRA assisted reproduction*. Mar 1 2018;22(1):61-66.
- 631 50. Penning TM, Ohnishi ST, Ohnishi T, Harvey RG. Generation of reactive oxygen species during  
632 the enzymatic oxidation of polycyclic aromatic hydrocarbon trans-dihydrodiols catalyzed by  
633 dihydrodiol dehydrogenase. *Chemical research in toxicology*. Jan-Feb 1996;9(1):84-92.
- 634 51. Lertratanangkoon K, Wu CJ, Savaraj N, Thomas ML. Alterations of DNA methylation by  
635 glutathione depletion. *Cancer letters*. Dec 9 1997;120(2):149-156.
- 636 52. Branco V, Matos B, Mourato C, Diniz M, Carvalho C, Martins M. Synthesis of glutathione as a  
637 central aspect of PAH toxicity in liver cells: A comparison between phenanthrene,  
638 Benzo[b]Fluoranthene and their mixtures. *Ecotoxicology and environmental safety*. Jan 15  
639 2021;208:111637.
- 640 53. Swain N, Samanta L, Agarwal A, et al. Aberrant Upregulation of Compensatory Redox  
641 Molecular Machines May Contribute to Sperm Dysfunction in Infertile Men with Unilateral  
642 Varicocele: A Proteomic Insight. *Antioxidants & redox signaling*. Mar 10 2020;32(8):504-521.

643

644



645 **Legends to figures**

646 **Fig. 1** Receiver Operating Characteristic (ROC) curves of polyaromatic hydrocarbons in  
647 semen of idiopathic infertile men (n=60) in comparison to fertile donor (n=43).

648 **Fig. 2** Comparison of redox status in the spermatozoa of fertile donor (n=43) and infertile  
649 patients (n=60). A. Levels of reduced (GSH) and Oxidized glutathione (GSSG); B.  
650 Spermatozoal redox status; C. Half cell reduction potential. D. Total antioxidant  
651 capacity. FD: Fertile donors; IIP: Idiopathic infertility patients. Data are expressed  
652 as mean  $\pm$  SD. \*p<0.05.

653 **Fig. 3** Comparative global proteomic profiling of spermatozoa between FD: Fertile Donors  
654 and IIP: Idiopathic infertility patients. (A) Venn diagram showing distribution of  
655 differentially expressed proteins (DEPs) (B) Heat map showing a hierarchical cluster  
656 of DEPs. The dendrogram for sample replicates (column clustering) separated the  
657 samples according to their clinical diagnosis into FD and IIF. Hierarchical clustering  
658 analysis between protein expression profiles of DEPs (row clustering) separated  
659 overexpressed DEPs in IIP from underexpressed DEPs in FD. The green and red  
660 colour denoted low and high expression levels respectively as shown in attached  
661 graduated colour scale bar.

662 **Fig. 4** Gene Ontology (GO) enrichment analysis result of differentially expressed proteins  
663 (DEPs) in IIP: Idiopathic infertile patients compared to FD: fertile donor. Bar graph  
664 showing the top GO terms for cellular component (A) molecular function (B) and  
665 biological process (C).

666 **Fig. 5** Cytoscape (BiNGO app) enrichment analysis revealed over-represented biological  
667 processes for the differentially expressed proteins (DEPs) in the spermatozoa of  
668 idiopathic infertile patients in comparison to fertile donor.

669 **Fig. 6** Ingenuity pathway Analysis of overexpressed proteins in Idiopathic infertile patients  
670 compared to fertile donor top Disease and Function (A) Cancer, Endocrine System  
671 Disorders, Organismal Injury and Abnormalities (B) Cell Death and Survival,  
672 Cellular Development, Organismal Survival.

673 **Fig. 7** Ingenuity pathway Analysis of underexpressed proteins in Idiopathic infertile  
674 patients compared to fertile donor top Disease and functions are Cancer, Cell Death  
675 and Survival, Organismal Injury and abnormalities.

676 **Fig. 8** Ingenuity Pathway Analysis (IPA) (A) Canonical pathways analysis and (B) toxicity  
677 lists analysis of the differentially expressed proteins (DEPs) of idiopathic infertile  
678 patients in comparison to fertile donors.

679 **Fig. 9** Expression profile of (A) 4-Hydroxynonenal (B) 3-nitrotyrosine (C) AhR (D) HSP90 $\beta$   
680 and their respective densitometry analysis in spermatozoa of FD: fertile donor and  
681 IIP: idiopathic infertile patient with total protein normalization (in arbitrary unit).  
682 p<0.05 with respect to fertile donor.

683 **Fig. 10** Schematic representation of molecular mechanisms involved in environmental borne  
684 polyaromatic hydrocarbon induced sperm dysfunction in idiopathic male infertility.

685

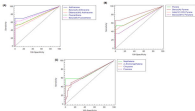

| St. No. | PAH (ng/ml)           | Control       | Isosipatin Isotretinoin | Mean Wilcoxon Test (p-value) |
|---------|-----------------------|---------------|-------------------------|------------------------------|
| 1       | Amifostine            | 9.88±15.55    | 45.68±103.52            | $P < 0.0001$                 |
| 2       | Hexam(A)/Amifostine   | 20.75±66.28   | 585.37±1685.67          | $P < 0.0001$                 |
| 3       | Hexam(A)/Pyrene       | 8.76±1.17     | 45.32±68.57             | $P < 0.0001$                 |
| 4       | Hexam(T)/Hexamethane  | 1.68±1.58     | 81.52±185.75            | $P < 0.0001$                 |
| 5       | Hexam(T)/Pyrene       | 7.26±26.82    | 196.18±291.58           | $P < 0.0001$                 |
| 6       | Chrysoin              | 8.26±1.18     | 25.77±23.38             | $P < 0.0001$                 |
| 7       | Dihexam(A)/Amifostine | 8.18±1.87     | 28.15±28.21             | $P < 0.0001$                 |
| 8       | Fluorene              | 49.62±185.32  | 1852.68±2581.24         | $P < 0.0001$                 |
| 9       | Hexamethane           | 1.85±1.25     | 22.58±25.77             | $P < 0.0001$                 |
| 10      | Indol(T)/PAH/Pyrene   | 8.24±1.11     | 7.32±8.68               | $P < 0.0001$                 |
| 11      | Naphthalene           | 179.65±279.65 | 1752.88±1738.21         | $P < 0.0001$                 |
| 12      | 2Hexamethylhexane     | 68.25±185.75  | 582.62±585.58           | $P < 0.0001$                 |
| 13      | Pyrene                | 4.88±11.68    | 54.22±54.68             | $P < 0.0001$                 |

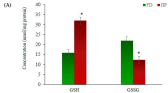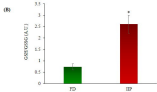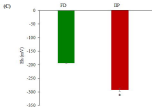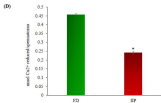

**A**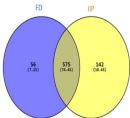**B**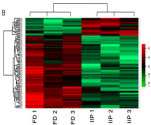

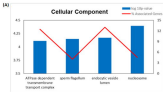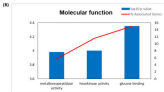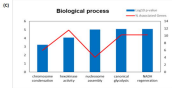



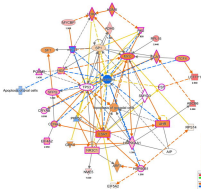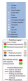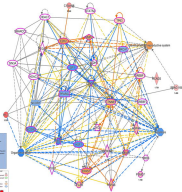





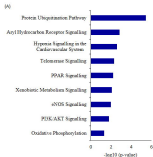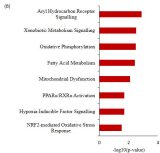

**A**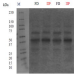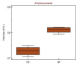**B**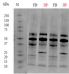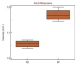**C**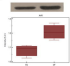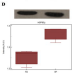**D**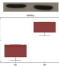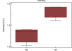

# Idiopathic infertile Men

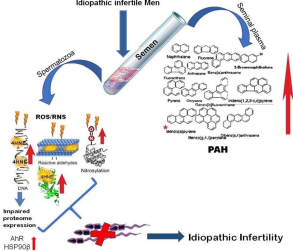

Source: https://www.biorxiv.org/content/10.1101/2022.03.21.484927v1.full.pdf
